# Supplementary material for: The expression patterns and prognostic significance of pleckstrin homology-like domain family A (PHLDA) in lung cancer and malignant mesothelioma
Source: PubMed Central journal article supplement — J Thorac Dis. 2021 Feb;13(2):689–707. doi: 10.21037/jtd-20-2909 (PMC7947487; doi:10.21037/jtd-20-2909), 2021-02
Supplement: jtd-13-02-689-supplementary.pdf [file jtd-13-02-689-supplementary.pdf]

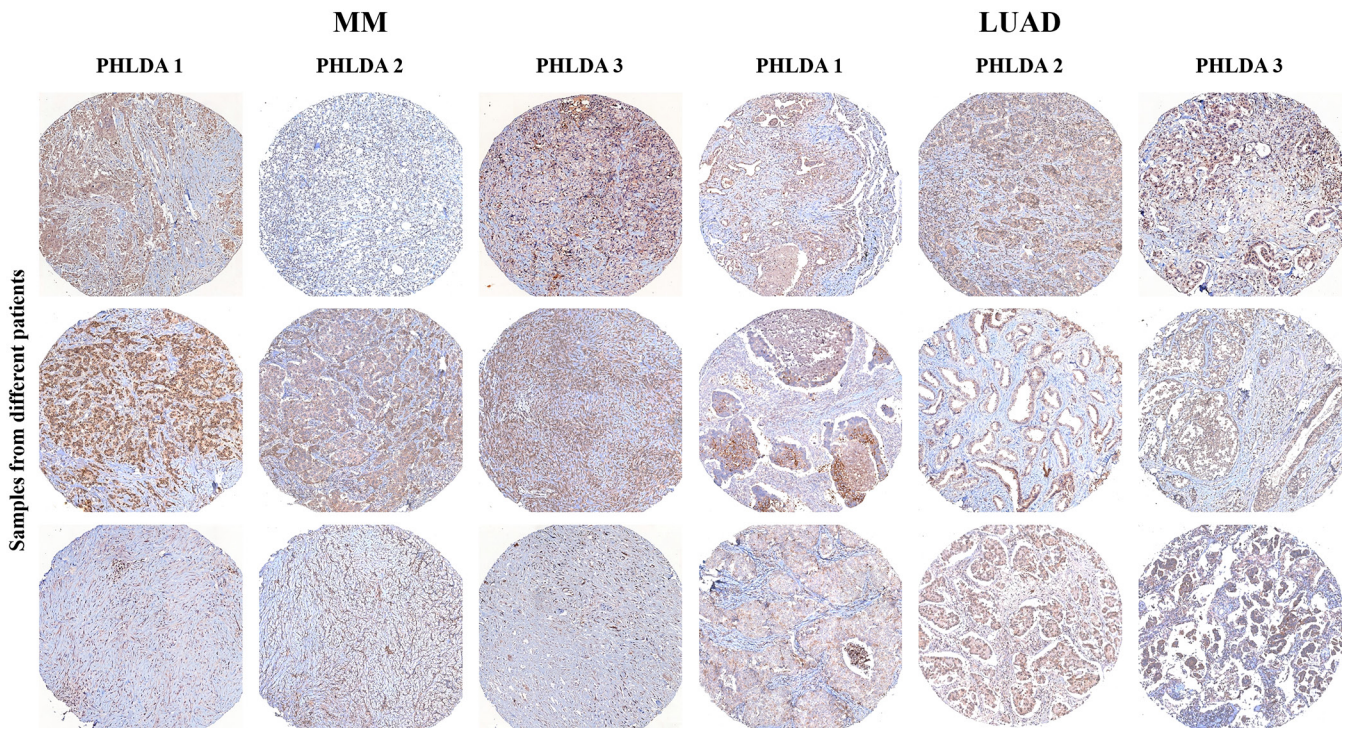

**Figure S1** Expression of PHLDA family in MM and lung adenocarcinoma (LUAD) tumors cores included in tissue microarray (TMA). Homogeneity observed between expression levels in different tumor cores. Original magnification 4×. PHLDA, pleckstrin homology domain family A; MM, malignant mesothelioma.

## Oncomine dataset

| Analysis Type by Cancer     | Cancer vs. Normal |    |
|-----------------------------|-------------------|----|
| Bladder Cancer              | 1                 |    |
| Brain and CNS Cancer        | 14                |    |
| Breast Cancer               |                   | 5  |
| Cervical Cancer             |                   | 2  |
| Colorectal Cancer           | 22                |    |
| Esophageal Cancer           |                   | 8  |
| Gastric Cancer              |                   |    |
| Head and Neck Cancer        | 1                 | 1  |
| Kidney Cancer               | 4                 |    |
| Leukemia                    | 2                 | 1  |
| Liver Cancer                |                   | 2  |
| Lung Cancer                 | 1                 |    |
| Lymphoma                    | 6                 | 4  |
| Melanoma                    | 5                 |    |
| Myeloma                     | 1                 |    |
| Other Cancer                | 4                 |    |
| Ovarian Cancer              | 1                 |    |
| Pancreatic Cancer           | 5                 |    |
| Prostate Cancer             |                   |    |
| Sarcoma                     | 1                 | 2  |
| Significant Unique Analyses | 66                | 24 |
| Total Unique Analyses       | 457               |    |

PHLDA1

| Analysis Type by Cancer     | Cancer vs. Normal |   |
|-----------------------------|-------------------|---|
| Bladder Cancer              |                   |   |
| Brain and CNS Cancer        | 3                 |   |
| Breast Cancer               | 4                 |   |
| Cervical Cancer             |                   |   |
| Colorectal Cancer           | 4                 |   |
| Esophageal Cancer           | 4                 |   |
| Gastric Cancer              |                   |   |
| Head and Neck Cancer        | 5                 |   |
| Kidney Cancer               | 3                 |   |
| Leukemia                    |                   | 1 |
| Liver Cancer                |                   |   |
| Lung Cancer                 | 8                 |   |
| Lymphoma                    | 10                |   |
| Melanoma                    |                   |   |
| Myeloma                     |                   |   |
| Other Cancer                | 4                 | 1 |
| Ovarian Cancer              | 3                 |   |
| Pancreatic Cancer           | 5                 |   |
| Prostate Cancer             |                   |   |
| Sarcoma                     |                   | 1 |
| Significant Unique Analyses | 53                | 3 |
| Total Unique Analyses       | 436               |   |

PHLDA2

| Analysis Type by Cancer     | Cancer vs. Normal |   |
|-----------------------------|-------------------|---|
| Bladder Cancer              |                   |   |
| Brain and CNS Cancer        |                   |   |
| Breast Cancer               | 1                 |   |
| Cervical Cancer             |                   |   |
| Colorectal Cancer           | 1                 |   |
| Esophageal Cancer           |                   | 2 |
| Gastric Cancer              | 1                 |   |
| Head and Neck Cancer        |                   |   |
| Kidney Cancer               |                   | 1 |
| Leukemia                    | 3                 |   |
| Liver Cancer                |                   |   |
| Lung Cancer                 |                   |   |
| Lymphoma                    | 5                 |   |
| Melanoma                    |                   |   |
| Myeloma                     |                   |   |
| Other Cancer                | 5                 |   |
| Ovarian Cancer              |                   |   |
| Pancreatic Cancer           | 2                 |   |
| Prostate Cancer             |                   |   |
| Sarcoma                     | 1                 | 6 |
| Significant Unique Analyses | 18                | 8 |
| Total Unique Analyses       | 360               |   |

PHLDA3

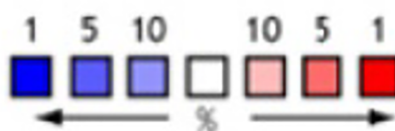

**Figure S2** Oncomine analysis of *PHLDA1*, *PHLDA2* and *PHLDA3* mRNA expression in different types of cancer, showing the differences in expression levels between tumor and normal tissue. Red cells represent overexpression of genes in tumor tissue compared to normal, whereas blue cells indicate underexpression, satisfying the thresholds  $P < 0.05$ ; fold change  $\geq 1.5$ ; gene rank  $\leq 10\%$ . PHLDA, pleckstrin homology domain family A.

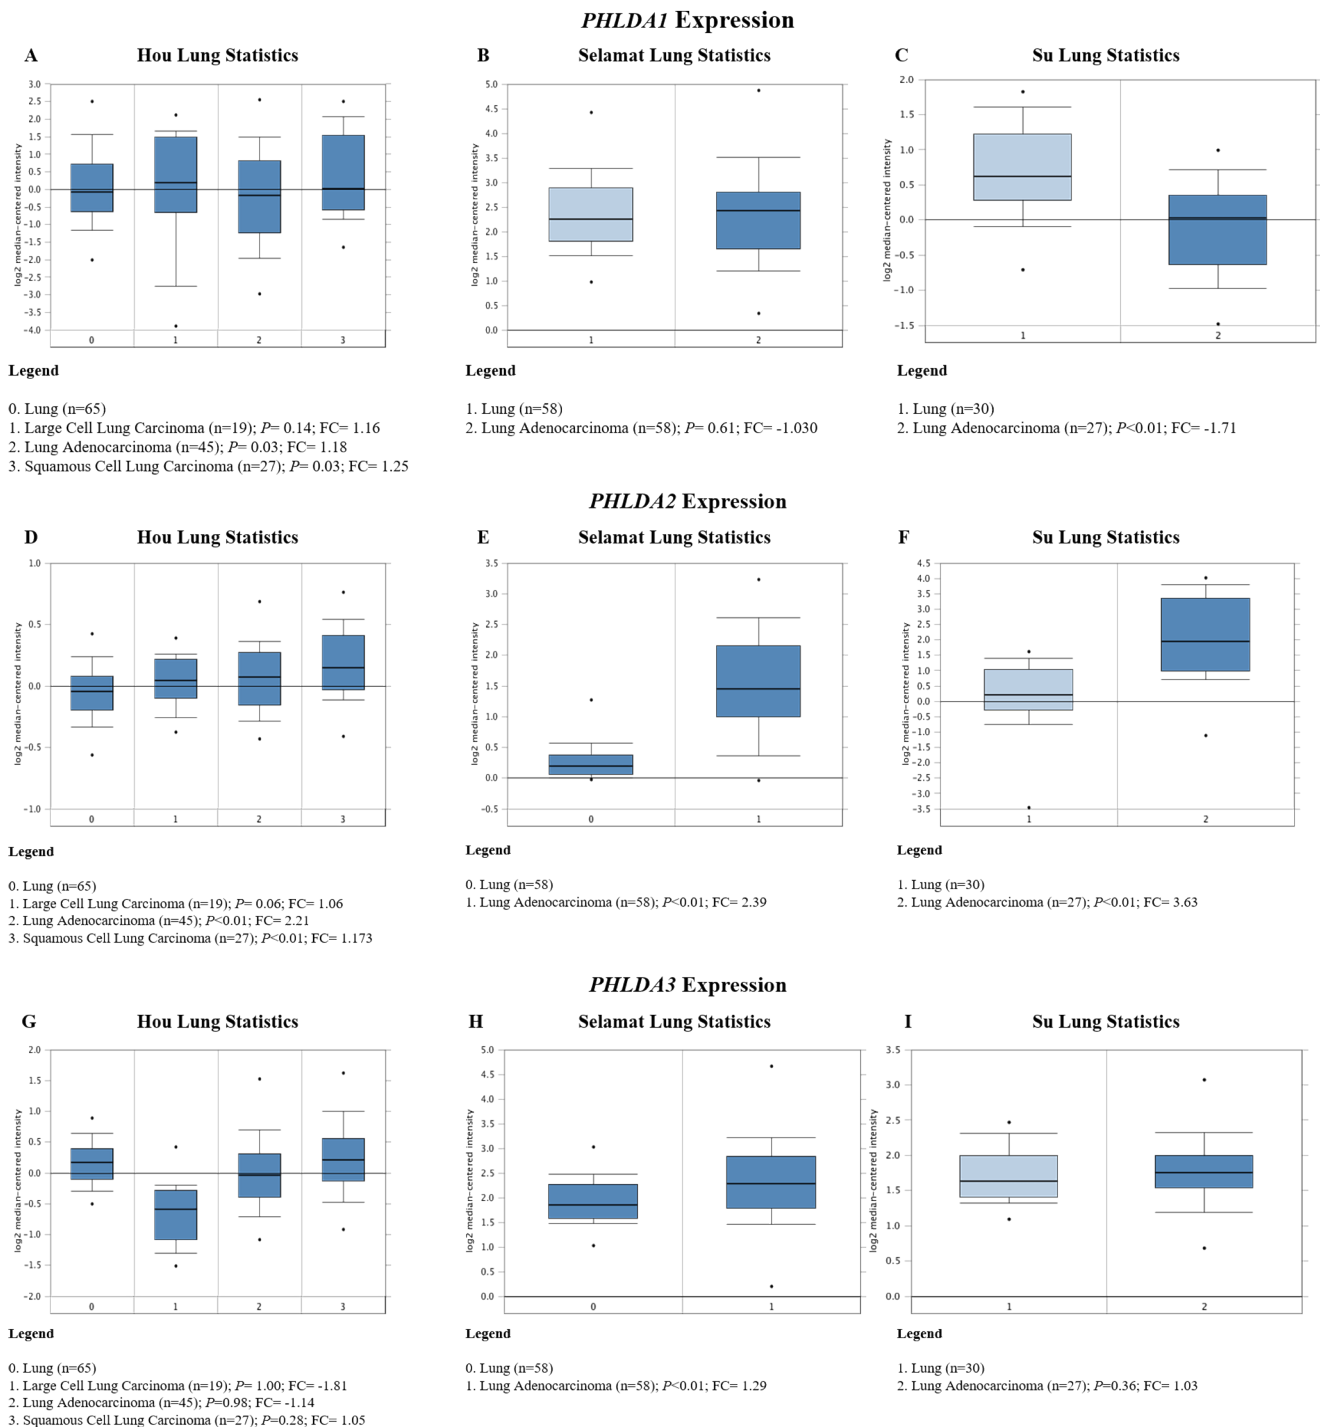

**Figure S3** Oncomine analysis of *PHLDA1*, *PHLDA2* and *PHLDA3* expression in NSCLC and their corresponding normal tissues. (A) In the Hou Lung and (B) Selamat datasets, there was no apparent change in *PHLDA1* gene expression in lung adenocarcinoma (LUAD) (fold change =1.18 and -1.03, respectively), whereas in the (C) Su dataset, there was a trend for underexpression of *PHLDA1* in LUAD tissue (fold change =-1.71). *PHLDA2* was overexpressed according to (D) Hou Lung (fold change = 2.21), (E) Selamat (fold change =2.39), and (F) Su (fold change =3.63) datasets. No changes were found in the expression levels of *PHLDA3* in LUAD according to (A) Hou Lung (fold change =-1.14), (B) Selamat (fold change =1.29) and (C) Su (fold change =1.03) datasets. PHLDA, pleckstrin homology domain family A.

**PHLDA Expression in Gordon Mesothelioma**  
Grouped by Cancer Type

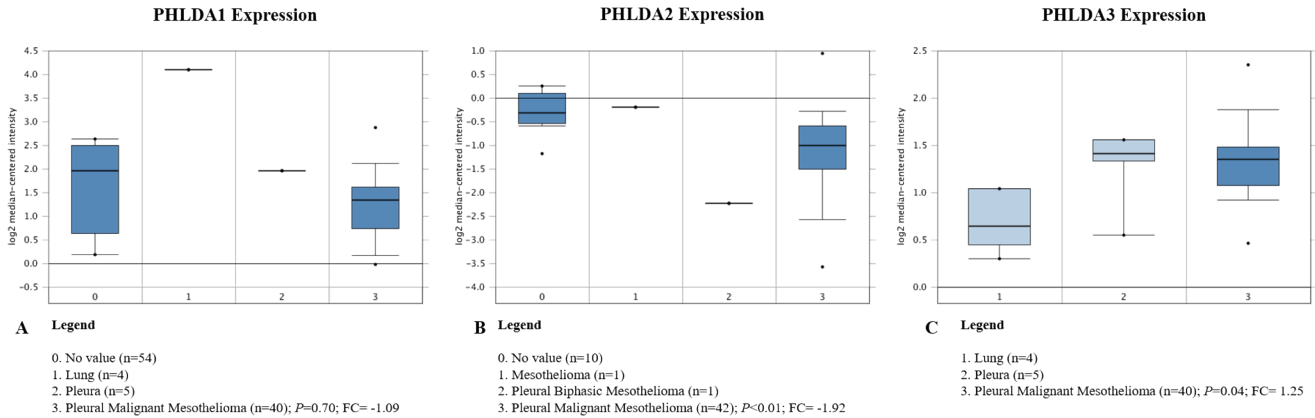

**Figure S4** *PHLDA* gene expression in malignant mesothelioma (MM) according to the Gordon Mesothelioma dataset. *PHLDA1* (A) and *PHLDA3* (C) were not significantly expressed in tumors compared to normal tissue (fold change = -1.09 and 1.25, respectively), (B) *PHLDA2* was underexpressed in MM (fold change = -1.92). The X-axis of the plot represents normal vs. pleural malignant mesothelioma, the Y-axis represents mRNA expression in log<sub>2</sub> median-centered intensity; the line in the middle represents the median value.  $P<0.05$  was considered significant. PHLDA, pleckstrin homology domain family A.

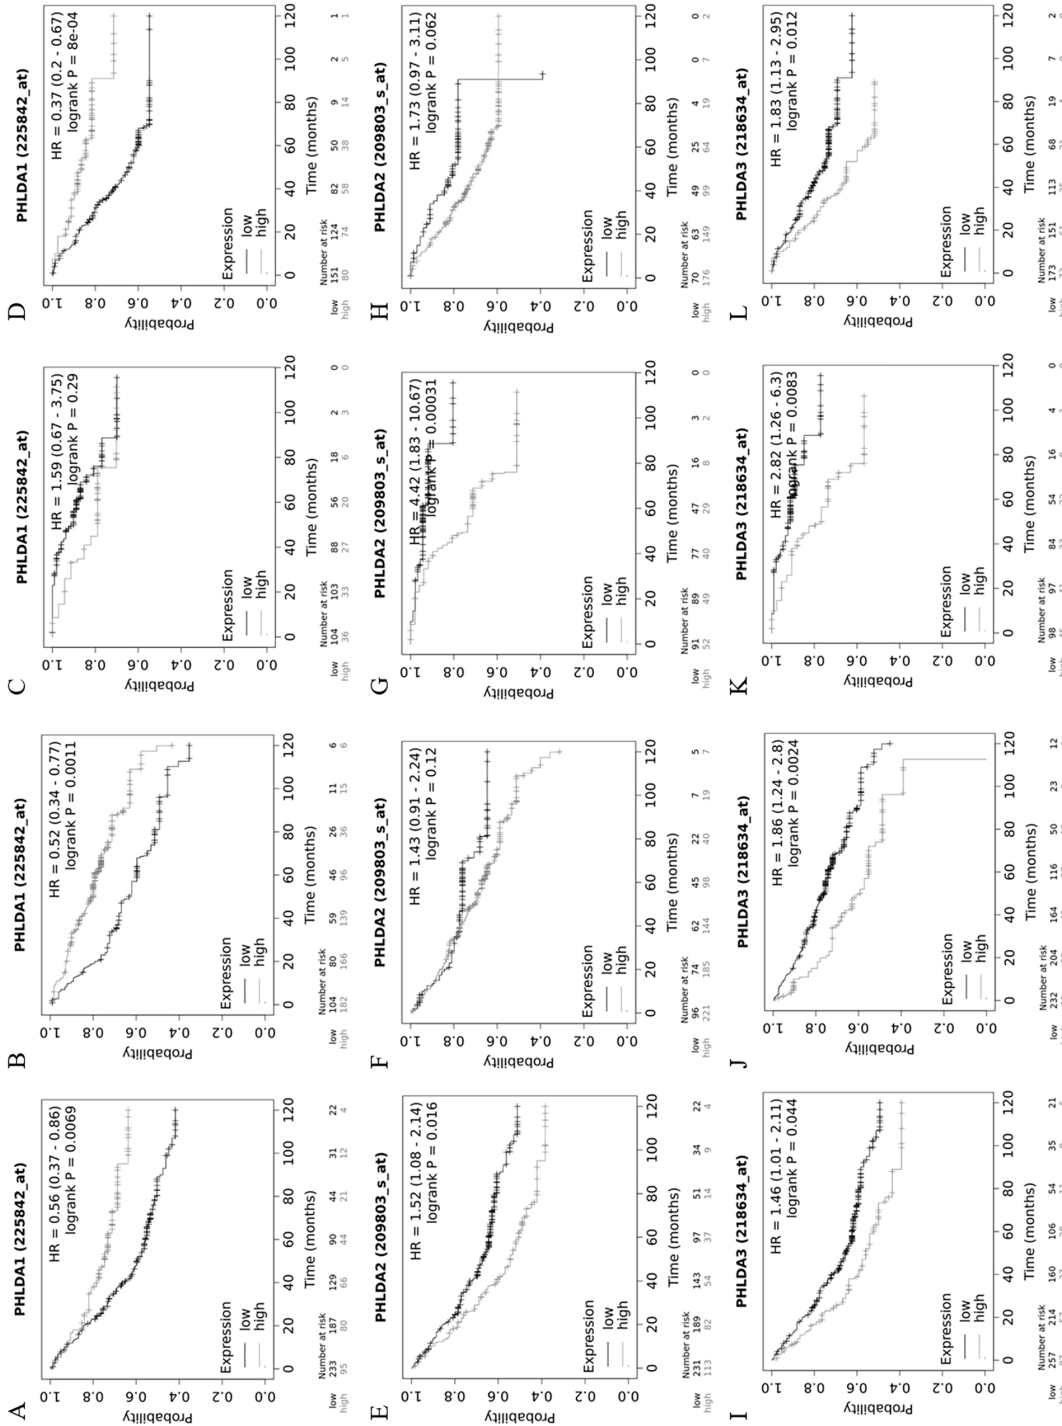

**Figure S5** This Kaplan Meier survival curve shows the correlation between pleckstrin homology domain family A (PHLDA) gene expression and overall survival (OS) in lung adenocarcinoma (LUAD) patients, according to the Kaplan–Meier plotter database. Low PHLDA1 expression was significantly related to worse survival in male patients (HR = 0.56; 95% CI: 0.37–0.86,  $P < 0.01$ ) (A), female patients (HR = 0.52; 95% CI: 0.34–0.77,  $P < 0.001$ ) (B), and smokers (HR = 0.37; 95% CI: 0.2–0.67,  $P < 0.01$ ) (D). (C) PHLDA1 expression was not statistically significant in never smokers. High PHLDA2 expression was significantly related to worse survival in male patients (HR = 1.52; 95% CI: 1.08–2.14,  $P = 0.02$ ) (E), and non-smokers (HR = 4.42; 95% CI: 1.83–10.67,  $P < 0.01$ ) (G). PHLDA2 gene expression was not statistically significant in female patients (F), and smokers (H). High PHLDA3 expression correlated with worse survival in male patients (HR = 1.46; 95% CI: 1.01–2.11,  $P = 0.04$ ) (I), female patients (HR = 1.86; 95% CI: 1.24–2.8,  $P < 0.01$ ) (J), non-smokers (HR = 2.82; 95% CI: 1.26–6.3,  $P < 0.01$ ) (K), and smokers (HR = 1.83; 95% CI: 1.13–2.95,  $P = 0.01$ ) (L).

**Table S1** Variables associated with overall survival (OS) of 87 patients diagnosed with Malignant mesothelioma. Univariate and multivariate analysis employed a Cox proportional hazards model using the Mesothelioma TCGA Firehose Legacy database by UCSC Xena tool

| Variables                          | Univariate     |         | Multivariate   |         |
|------------------------------------|----------------|---------|----------------|---------|
|                                    | HR (95% CI)    | P-value | HR (95% CI)    | P-value |
| Age                                | 0.76 (0.3-1.8) | 0.53    |                |         |
| Sex (Male vs. Female)              | 0.90 (0.5-1.6) | 0.73    |                |         |
| TP53 (Mutated vs. Wild type)       | 1.04 (0.5-2.0) | 0.92    |                |         |
| Lymph node (Positive vs. Negative) | 0.91 (0.6-1.5) | 0.71    |                |         |
| Stage                              |                | 0.77    |                |         |
| Stage (II vs. I)                   | 0.64 (0.3-1.5) | 0.31    |                |         |
| Stage (III vs. I)                  | 0.78 (0.4-1.6) | 0.51    |                |         |
| Stage (IV vs. I)                   | 0.71 (0.3-1.7) | 0.44    |                |         |
| PHLDA3 (High vs. Low)              | 1.29 (0.8-2.0) | 0.27    |                |         |
| PHLDA1 (High vs. Low)              | 1.80 (1.1-2.9) | 0.01    | 1.64 (1.0-2.6) | 0.04    |
| PHLDA2 (High vs. Low)              | 1.87 (1.2-3.0) | <0.01   | 1.71 (1.1-2.7) | 0.03    |

HR: Hazard ratio; 95% CI: 95% confidence intervals.
